# Supplementary material for: Hydrogenation of furfural by noble metal-free nickel modified tungsten carbide catalysts
Source: Royal Society of Chemistry journal article supplement (doi:10.1039/d0ra02003f), 2020-01-01
Supplement: d0ra02003f1.pdf [file d0ra02003f1.pdf]

## Supplementary Information

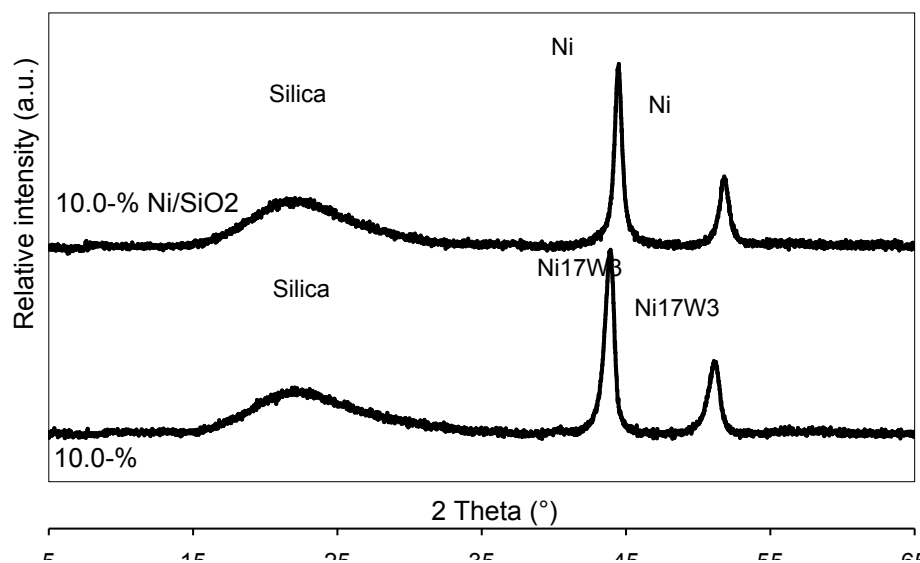

Figure S1: X-ray diffractograms of Ni/SiO<sub>2</sub> and Ni<sub>17</sub>W<sub>3</sub>/SiO<sub>2</sub> catalysts. Both catalysts are loaded with 10 wt.-% metal.

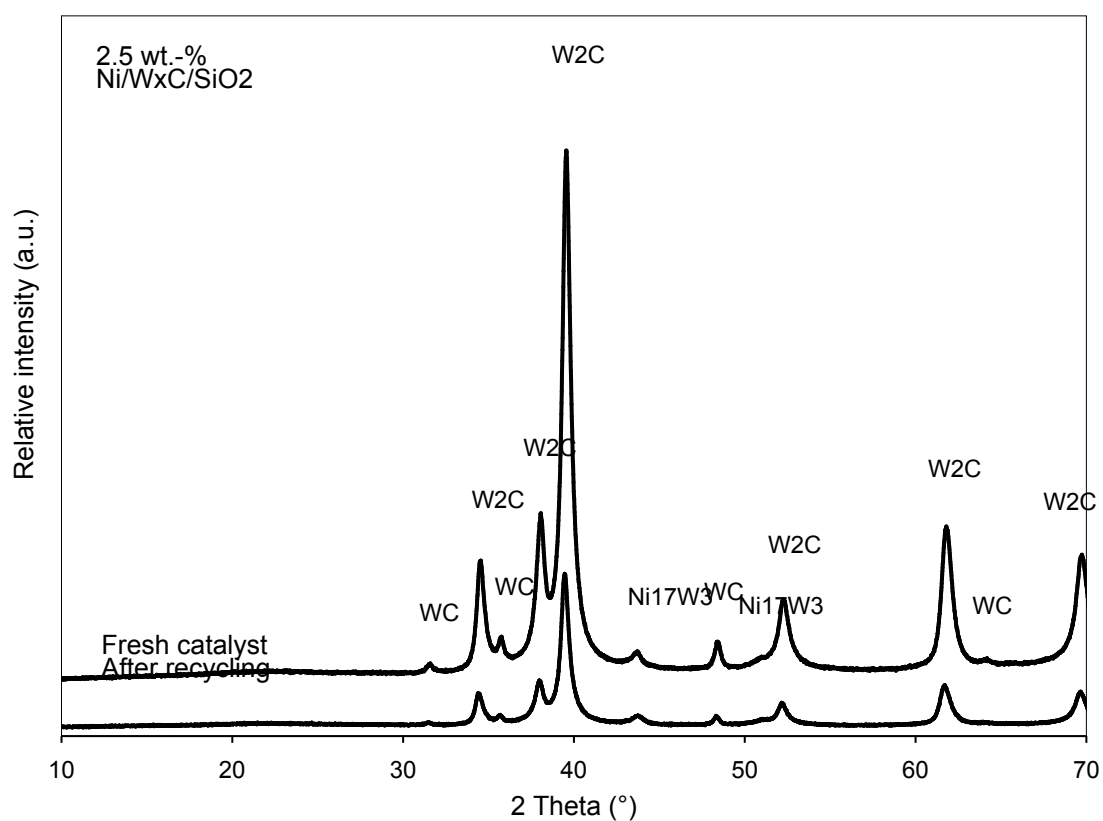

Figure S2: X-ray diffractograms of the 2.5 wt.-% Ni/W<sub>x</sub>C/SiO<sub>2</sub> catalysts directly after synthesis and after the recycling catalysis tests with a total of 26 h under reaction conditions.

Table S1: Textural properties of catalysts as determined by isothermal nitrogen adsorption (BET method).

| Entry | Catalyst                                                   | Surface area<br>(m <sup>2</sup> /g) | Pore volume<br>(mL/g) | Pore radius<br>(nm) |
|-------|------------------------------------------------------------|-------------------------------------|-----------------------|---------------------|
| 1     | W <sub>x</sub> C/SiO <sub>2</sub>                          | 96,84                               | 0,52                  | 1,69                |
| 2     | 0.5 %-Ni/W <sub>x</sub> C/SiO <sub>2</sub>                 | 81,66                               | 0,42                  | 1,69                |
| 3     | 1.0 %-Ni/W <sub>x</sub> C/SiO <sub>2</sub>                 | 77,26                               | 0,44                  | 1,70                |
| 4     | 2.5 %-Ni/W <sub>x</sub> C/SiO <sub>2</sub>                 | 75,66                               | 0,45                  | 1,68                |
| 5     | 4.0 %-Ni/W <sub>x</sub> C/SiO <sub>2</sub>                 | 73,85                               | 0,45                  | 1,68                |
| 6     | 9.0 %-Ni/W <sub>x</sub> C/SiO <sub>2</sub>                 | 70,38                               | 0,48                  | 1,68                |
| 7     | 10.0 %-Ni/SiO <sub>2</sub>                                 | 151,47                              | 1,24                  | 1,69                |
| 8     | 10.0 %-Ni <sub>17</sub> W <sub>3</sub> /SiO <sub>2</sub>   | 149,18                              | 1,29                  | 1,69                |
| 9     | 2.5 %-Ni/W <sub>x</sub> C/SiO <sub>2</sub> after recycling | 83,79                               | 0,55                  | 1,69                |

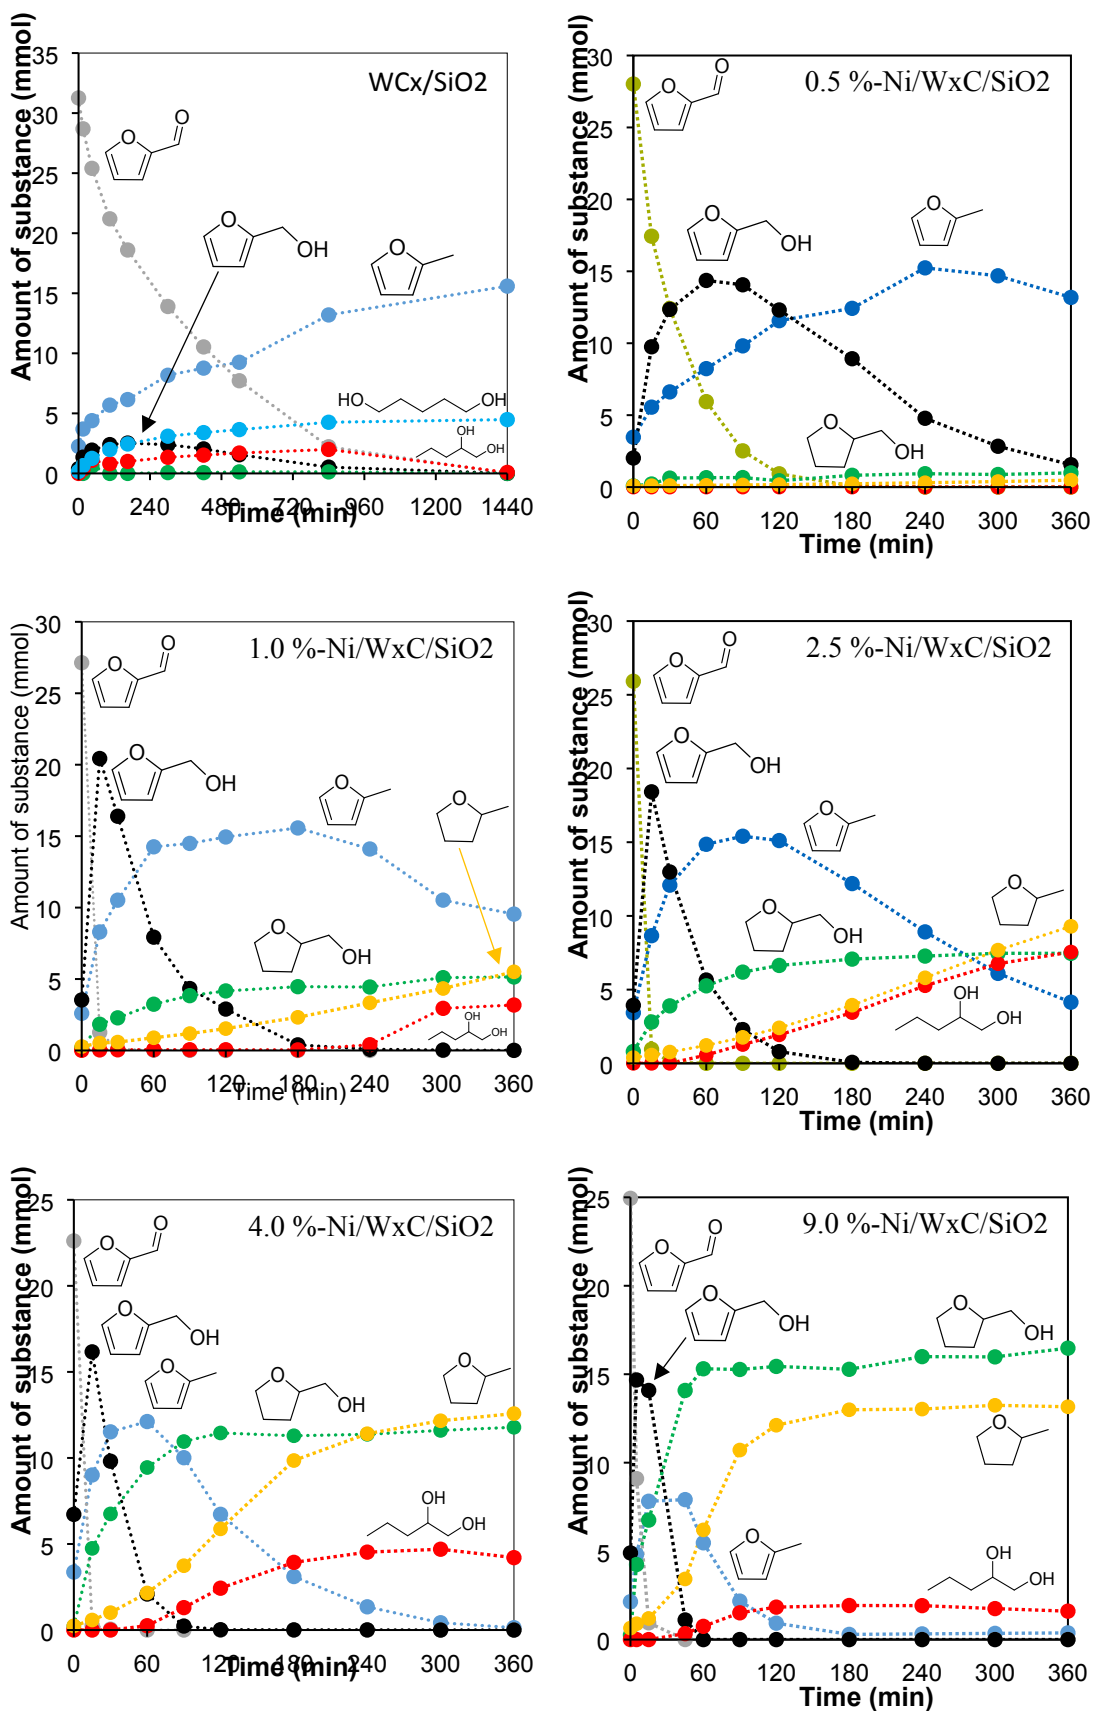

Figure S3: Reaction progress during catalytic conversion of furfural for tungsten carbide catalysts with differing nickel loadings from 0.0 to 9.0 wt.-% in the catalyst precursor. The reaction proceeds at 200 °C under 65 bar H<sub>2</sub>, with 0.50 g catalyst and 3 mL furfural in isopropyl alcohol as solvent. The total reaction time for W<sub>x</sub>C/SiO<sub>2</sub> (without Ni) is 24 h, else it is 6 h.

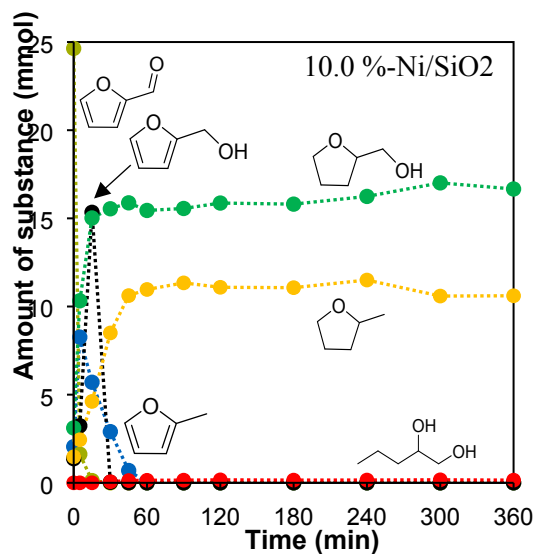

Figure S4: Reaction progress during catalytic conversion of furfural over a Ni/SiO<sub>2</sub> catalyst. The reaction proceeds at 200 °C under 65 bar H<sub>2</sub>, with 0.50 g catalyst and 3 mL furfural in isopropyl alcohol as solvent.

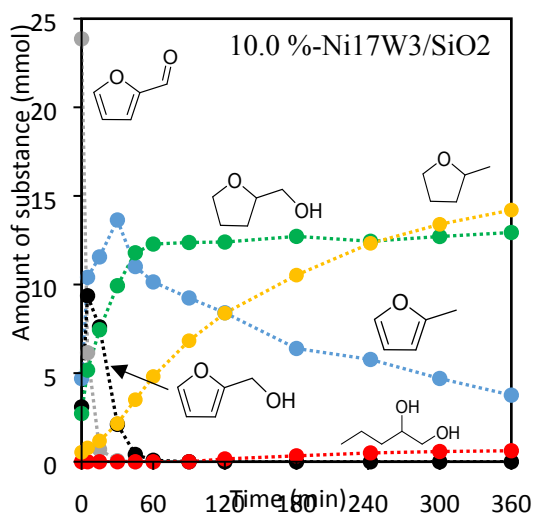

Figure S5: Reaction progress during catalytic conversion of furfural over a Ni<sub>17</sub>W<sub>3</sub>/SiO<sub>2</sub> catalyst. The reaction proceeds at 200 °C under 65 bar H<sub>2</sub>, with 0.50 g catalyst and 3 mL furfural in isopropyl alcohol as solvent.

Formulas for the calculation of conversion, yield and selectivity.

$$\text{Conversion} = 1 - \frac{n_{(\text{Furfural, out})}}{n_{(\text{Furfural, in})}}$$

$$\text{Yield}_{(\text{Product})} = \frac{n_{(\text{Product, out})}}{n_{(\text{Furfural, in})}}$$

$$\text{Selectivity}_{(\text{Product})} = \text{Conversion} \times \text{Yield}_{(\text{Product})}$$
